# Supplementary material
Source: publisher figshare collection journal article supplement (https://springernature.figshare.com/ndownloader/files/16880633)
Supplement: Supplementary file 1 [file 16880633]

## Sheet: Sheet1
Search string	Number of hits (Web of Science Core Collection)	Date	Test list articles not found		Number of hits (Scopus)	Date	Test list articles not found
#1 TS=((Boreal NEAR/5 (forest* OR zone OR tree*)) OR taiga OR spruce* or picea or pine* or pinus or birch* or aspen* or populus) #2 TS=(Finland or Finnish or Swed* or Norw* or Russia* or Estonia* or Latvia* or Lithuania*or Fennoscan* or Scandin* or Baltic OR "North* Europ*" or Canad* or "North* Ameri*" or Siber* or Alaska or "United States" or USA) and TS= (forest* or tree*) #3 #1 OR #2 #4 TS=("k…	8189	03.06.	0		11066	03.06.	0
